# Supplementary material for: Dhurrin metabolism in the developing grain of Sorghum bicolor (L.) Moench investigated by metabolite profiling and novel clustering analyses of time-resolved transcriptomic data
Source: PubMed Central journal article supplement (PMC5154151; doi:10.1186/s12864-016-3360-4), 2016-12-13
Supplement: 12864_2016_3360_MOESM1_ESM.pdf [file 12864_2016_3360_MOESM1_ESM.pdf]

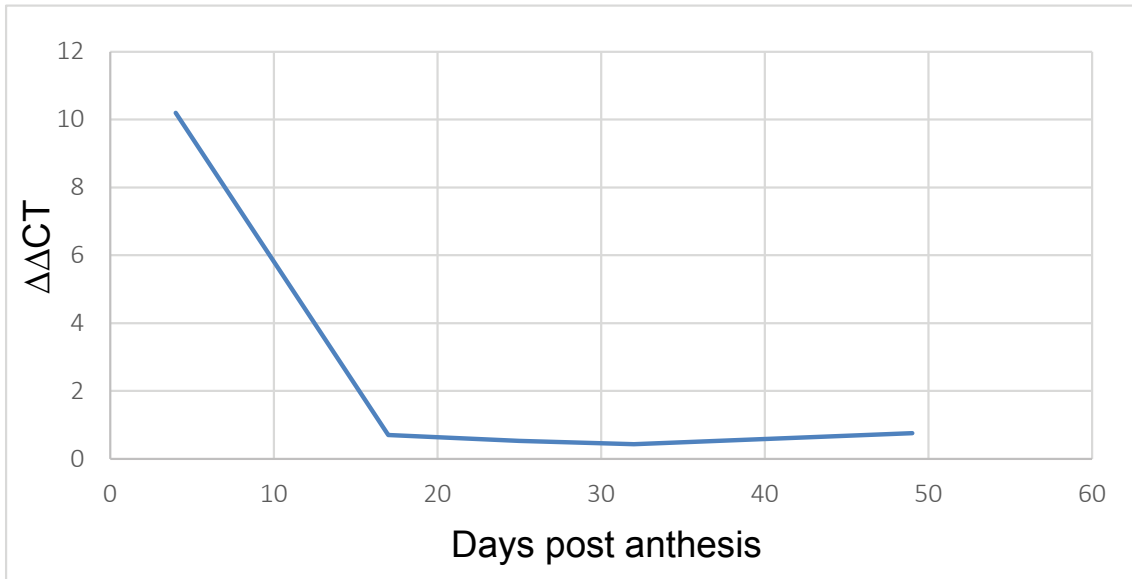

**Additional file 1A.** Expression profile of CAS measured by qPCR in the developing grains at day 4, 17, 25, 32 and 49 days after anthesis.

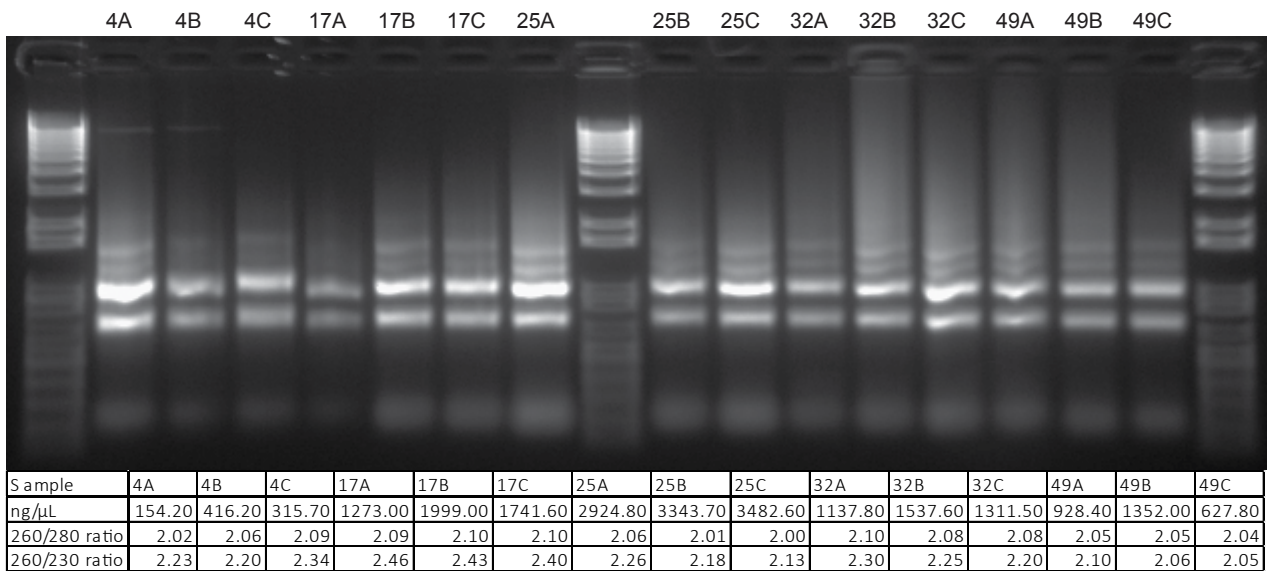

**Additional file 1B.** The integrity, concentration and purity of the RNA used for the qPCR analysis, analyzed on a 1% agarose gel and with Nanodrop spectrophotometer (table below gel).

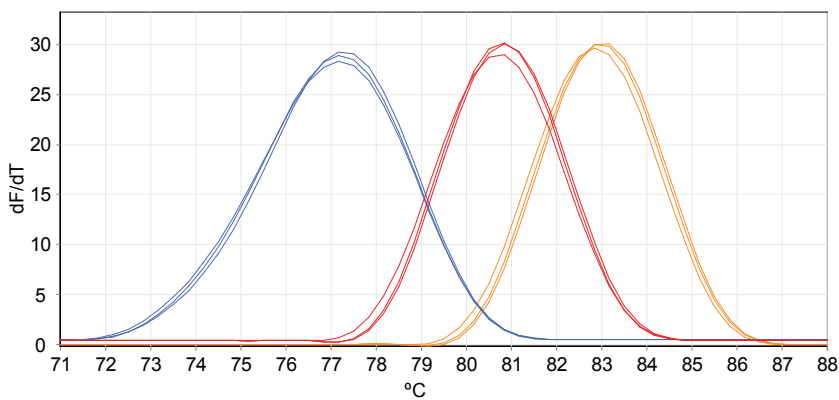

**Additional file 1C.** Melting curve analysis for the three genes used for the qPCR analysis. AAPK (blue), ZF (red), CAS (orange).

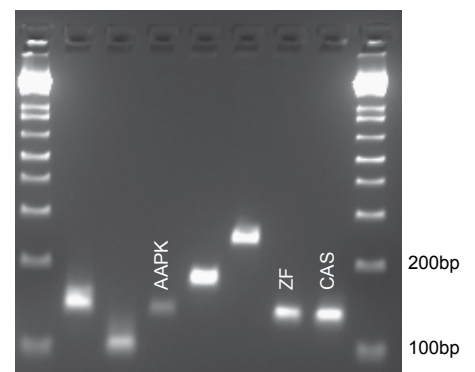

**Additional file 1D.** qPCR product run on 4% agarose gel and visualized with GelRed™. The size of the products corresponds to the DNA sequence they are supposed to replicate: AAPK (140bp), ZF (132bp) and CAS (133bp).

```

CAS
Consensus      CATTGTGACTGTTCTTCCAAGCCTTGGGGAGCGATACTTGTTCATCTGCGCTGTTTGTAGAGTTGAGAAAGGAGGCTGAAGCAATGGAACCACTGCCGGTG
Sequencing     ~~~~~~TGTCCTCTGCGCTGTTTGTAGAGTTGAGAAAGGAGGCTGAAGCAATGGAACCACTGCCGGTG
                GATTAATTTGGCCAATCAAACCGGGCACTGGAA
                |||
                GATTAATTTGGCCAATCAAACCGGGCACTAGGA

ZF
Consensus      TCCACCAGCACTCAGGTTTCATTGAGCGCTGTAGTTTGTCTCTAACTGATATGGTGTTCATTGAGAAGGACTATTTGGAACATGAGTTAAACTGCATCT
Sequencing     ~~~~~~TTGTCGTA~CTGATATGGTGTTCATTGAGAAGGACTATTTGGAACATGAGTTAAACAGCATCT
                CTG~GTCCTGGGATTCAAAGTACCGAGTCCAGCT
                |||
                CAGAGTCCCAGGATTCAAAGTACCGAGTCCAGCT

AAPK
Consensus      GGAATGGTGCATTATGCCGTGTTAATCCAGCAAATCTG~TATTAGATTAATTAAGAAGGCTTCTGTTATGTTTATACTATGCCATTTCTTTGGAAGTT
Sequencing     ~~~~~~CAATTCTGATGTTAGATTAATTAAGAAGGCTTCTGTTATGTTTATACTATGCCATTTCTTTGGAAGTT
                TGGATAGTTTGTCTGATCAAATGCGTGGTAACCATTAGGAG
                |||
                TGGATAGTTTGTCTGATCAAATGCGTGGTAACCATTAGGAG

```

**Additional file 1E.** Alignment of Sanger sequencing result against the specific genes of interest CAS, ZF and AAPK. The primer binding sites for the forward and reverse primers are marked in red font.

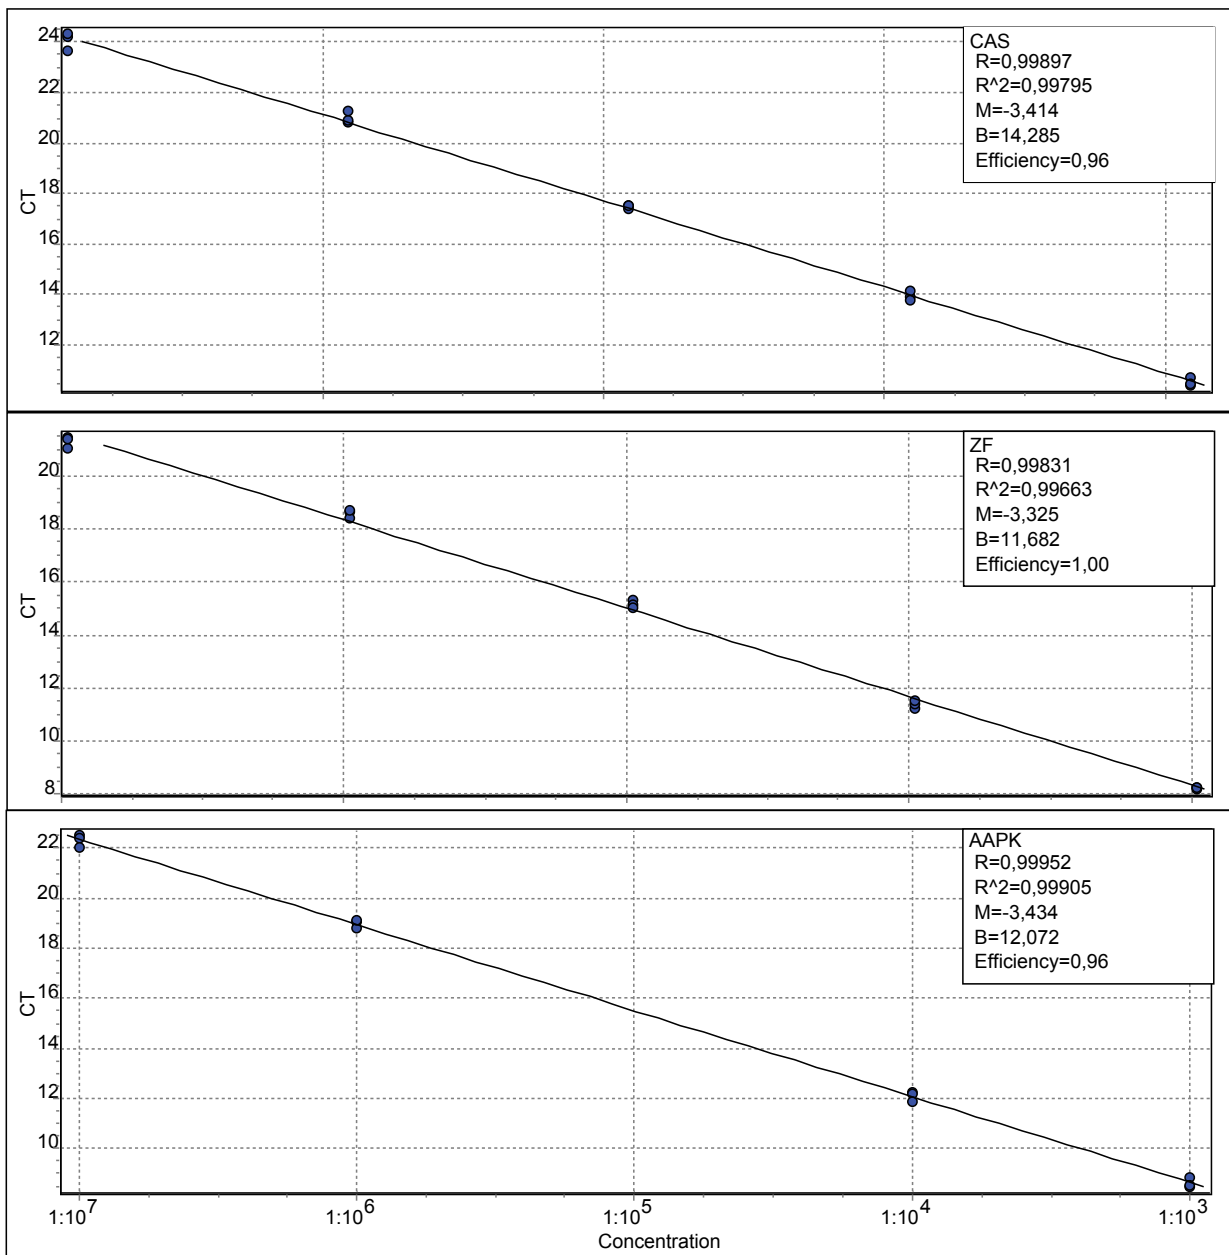

**Additional file 1F.** Efficiency test of the primers specific for the genes CAS, ZF and AAPK on serial dilutions of template in the following dilutions: 1:10<sup>3</sup>, 1:10<sup>4</sup>, 1:10<sup>5</sup>, 1:10<sup>6</sup>, 1:10<sup>7</sup>.
