# Supplementary material for: Dhurrin metabolism in the developing grain of Sorghum bicolor (L.) Moench investigated by metabolite profiling and novel clustering analyses of time-resolved transcriptomic data
Source: PubMed Central journal article supplement (PMC5154151; doi:10.1186/s12864-016-3360-4), 2016-12-13
Supplement: 12864_2016_3360_MOESM5_ESM.pdf [file 12864_2016_3360_MOESM5_ESM.pdf]

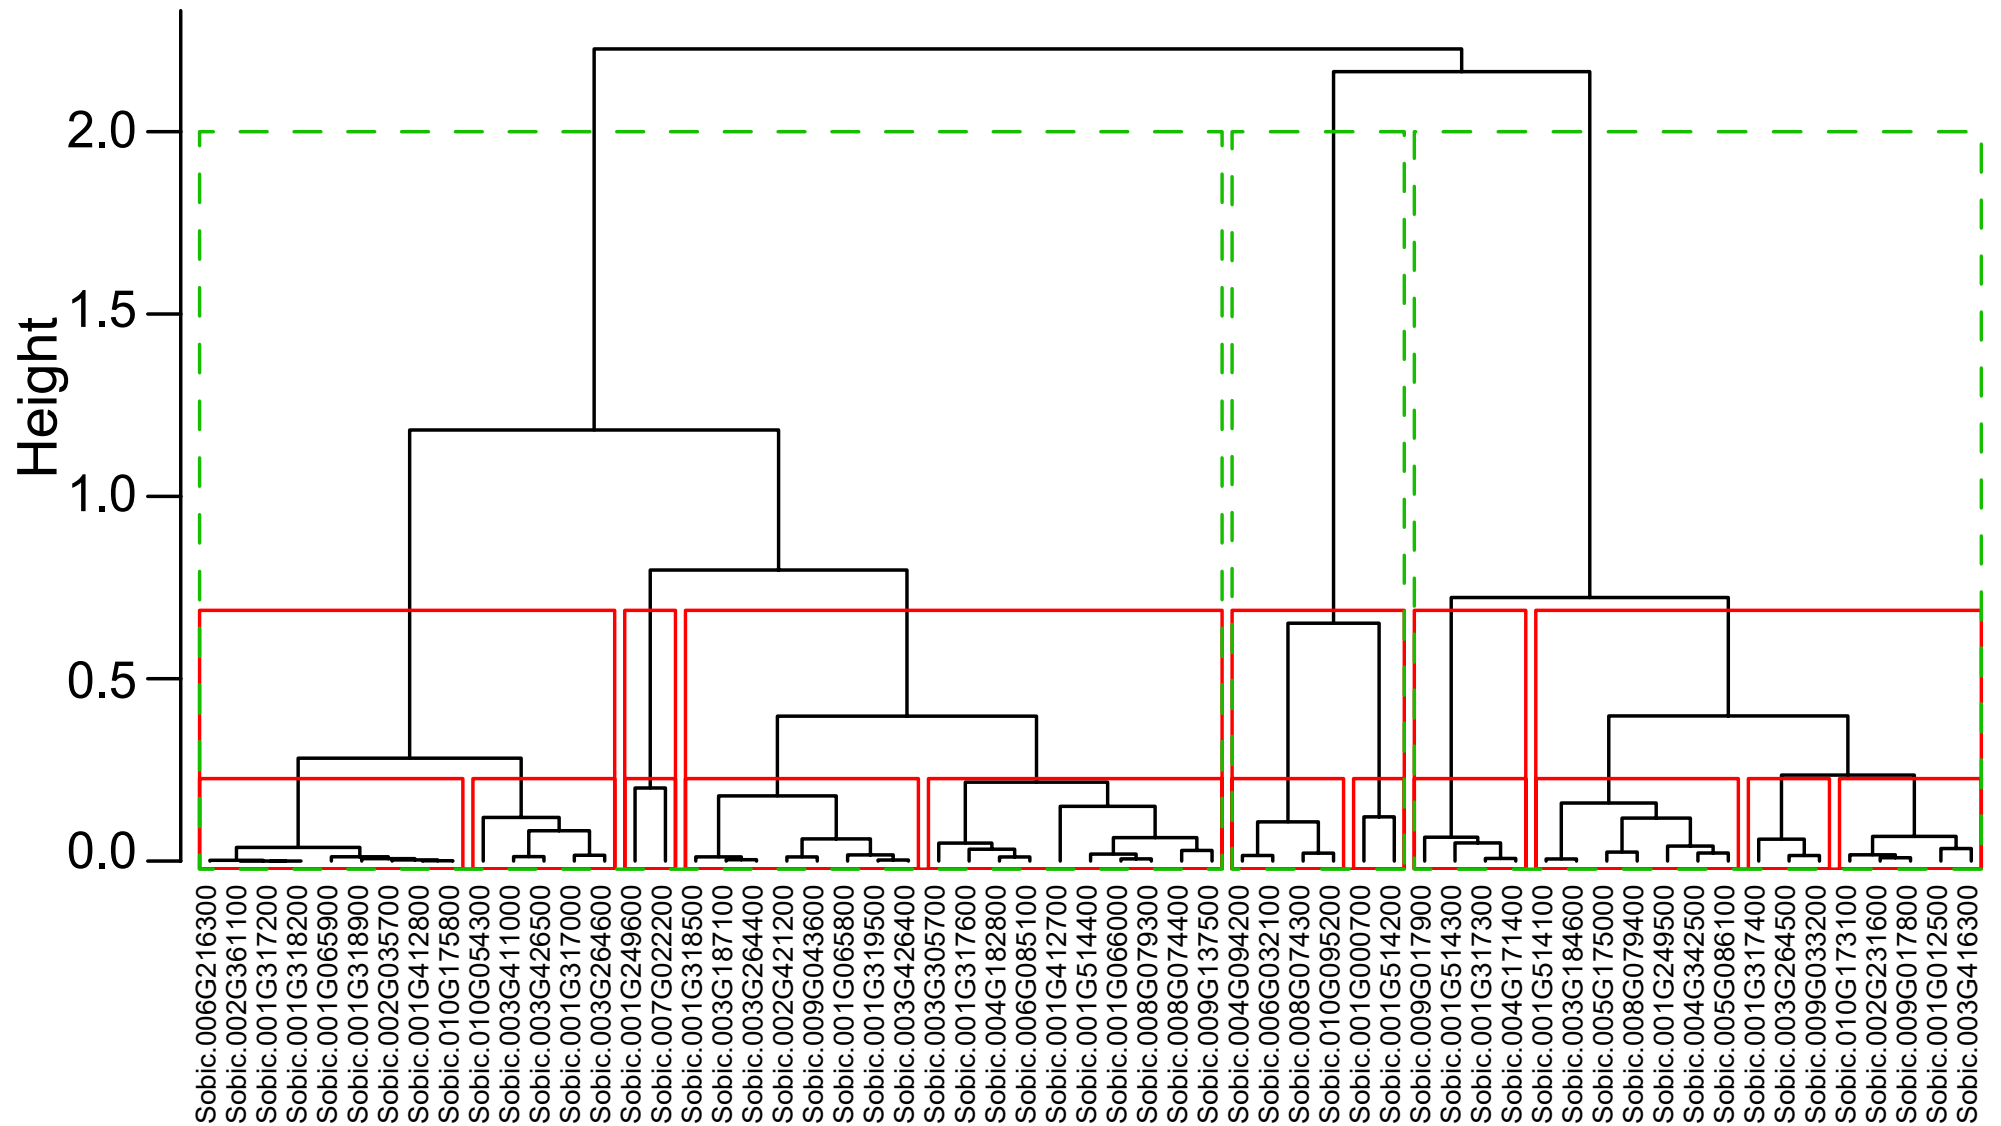

**Additional file 5.** Plot of the dendrogram from the hierarchical clustering of expressed GST genes, showing the relation between the 6 clusters and the 12 subgroups marked by red boxes in the bottom of the figure. The gene names belonging to the different clusters are listed below. The 6 clusters can be divided into 3 clades (marked by green dashed lines) containing genes with an overall similar profile.
