# Supplementary material for: Dhurrin metabolism in the developing grain of Sorghum bicolor (L.) Moench investigated by metabolite profiling and novel clustering analyses of time-resolved transcriptomic data
Source: PubMed Central journal article supplement (PMC5154151; doi:10.1186/s12864-016-3360-4), 2016-12-13
Supplement: 12864_2016_3360_MOESM7_ESM.pdf [file 12864_2016_3360_MOESM7_ESM.pdf]

Nitrilase

$\beta$ -Ureidopropionase

Glutamine-dependent NAD synthetase

Nit

N-carbamyl putrescine amidohydrolase

|   |   |   |   |   |
|---|---|---|---|---|
| F | P | E | a | F |
| l | Q | E | A | W |
| G | P | E | L | E |
| l | P | E | . | w |
| i | Q | E | L | F |

|   |   |   |   |   |   |   |
|---|---|---|---|---|---|---|
| H | R | K | l | . | P | T |
| h | R | K | N | H | I | P |
| P | P | K | M | . | L | A |
| . | R | K | . | H | L | F |
| Y | R | K | s | H | L | P |

|   |   |   |   |   |   |   |   |   |
|---|---|---|---|---|---|---|---|---|
| L | . | C | W | E | N | r | m | P |
| N | I | C | Y | G | R | h | H | P |
| E | t | C | E | E | L | f | t | . |
| . | . | C | . | D | . | R | F | . |
| g | I | C | W | D | Q | W | F | P |

**Additional file 7.** Consensus sequences around EKC catalytic triad. The catalytic residues are marked by red. Uppercase letters represents residues in accordance with the residues specified in Pace and Brenner (2001) and lowercase letters, represents residues with internal consensus, but not with the former article. The dots represents varying residues.
